# Supplementary material for: Oxygen-Enhanced Optoacoustic Tomography Reveals the Effectiveness of Targeting Heme and Oxidative Phosphorylation at Normalizing Tumor Vascular Oxygenation
Source: Oxford University Press journal article supplement (doi:10.1158/0008-5472.can-19-3247), 2020-06-16
Supplement: 00085472can193247-sup-230823_3_supp_6342553_qbkmbx.docx [file 00085472can193247-sup-230823_3_supp_6342553_qbkmbx.docx]

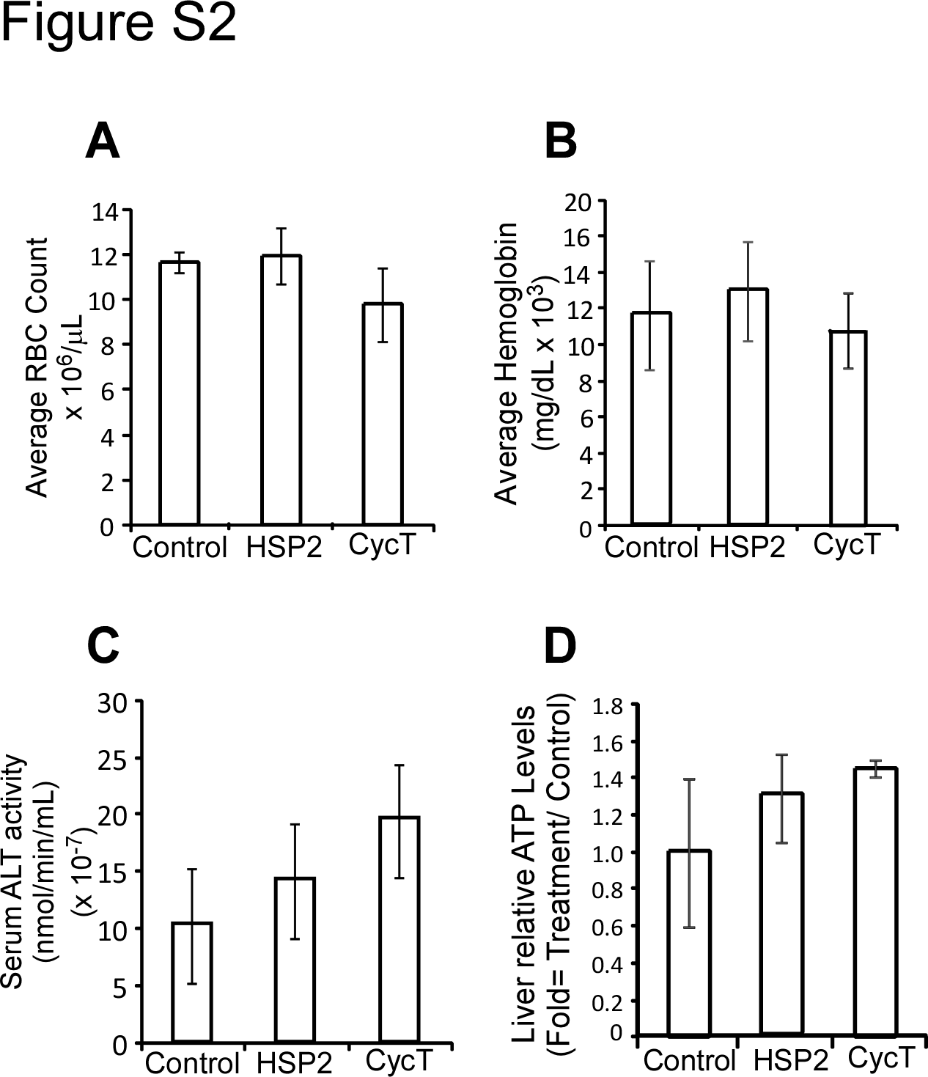


Fig. S2. HSP2 and CycT did not significantly affect blood and liver functions.(A) Average red blood cell count in mice bearing subcutaneous lung tumor xenografts treated with or without HSP2 or CycT. (B) Average hemoglobin levels in mice treated with or without HSP2 or CycT. (C) Average serum ALT (alanine transaminase) levels treated with or without HSP2 or CycT. (D) ATP levels measured in cells from livers excised from mice treated with HSP2, CycT, or control saline. Data are plotted as mean ± SD. For statistical analysis, the levels in treated mice were compared to the levels in untreated mice with a Welch 2-sample t-test.
