# Supplementary material for: Oxygen-Enhanced Optoacoustic Tomography Reveals the Effectiveness of Targeting Heme and Oxidative Phosphorylation at Normalizing Tumor Vascular Oxygenation
Source: Oxford University Press journal article supplement (doi:10.1158/0008-5472.can-19-3247), 2020-06-16
Supplement: 00085472can193247-sup-230823_3_supp_6342554_qbkmbx.docx [file 00085472can193247-sup-230823_3_supp_6342554_qbkmbx.docx]

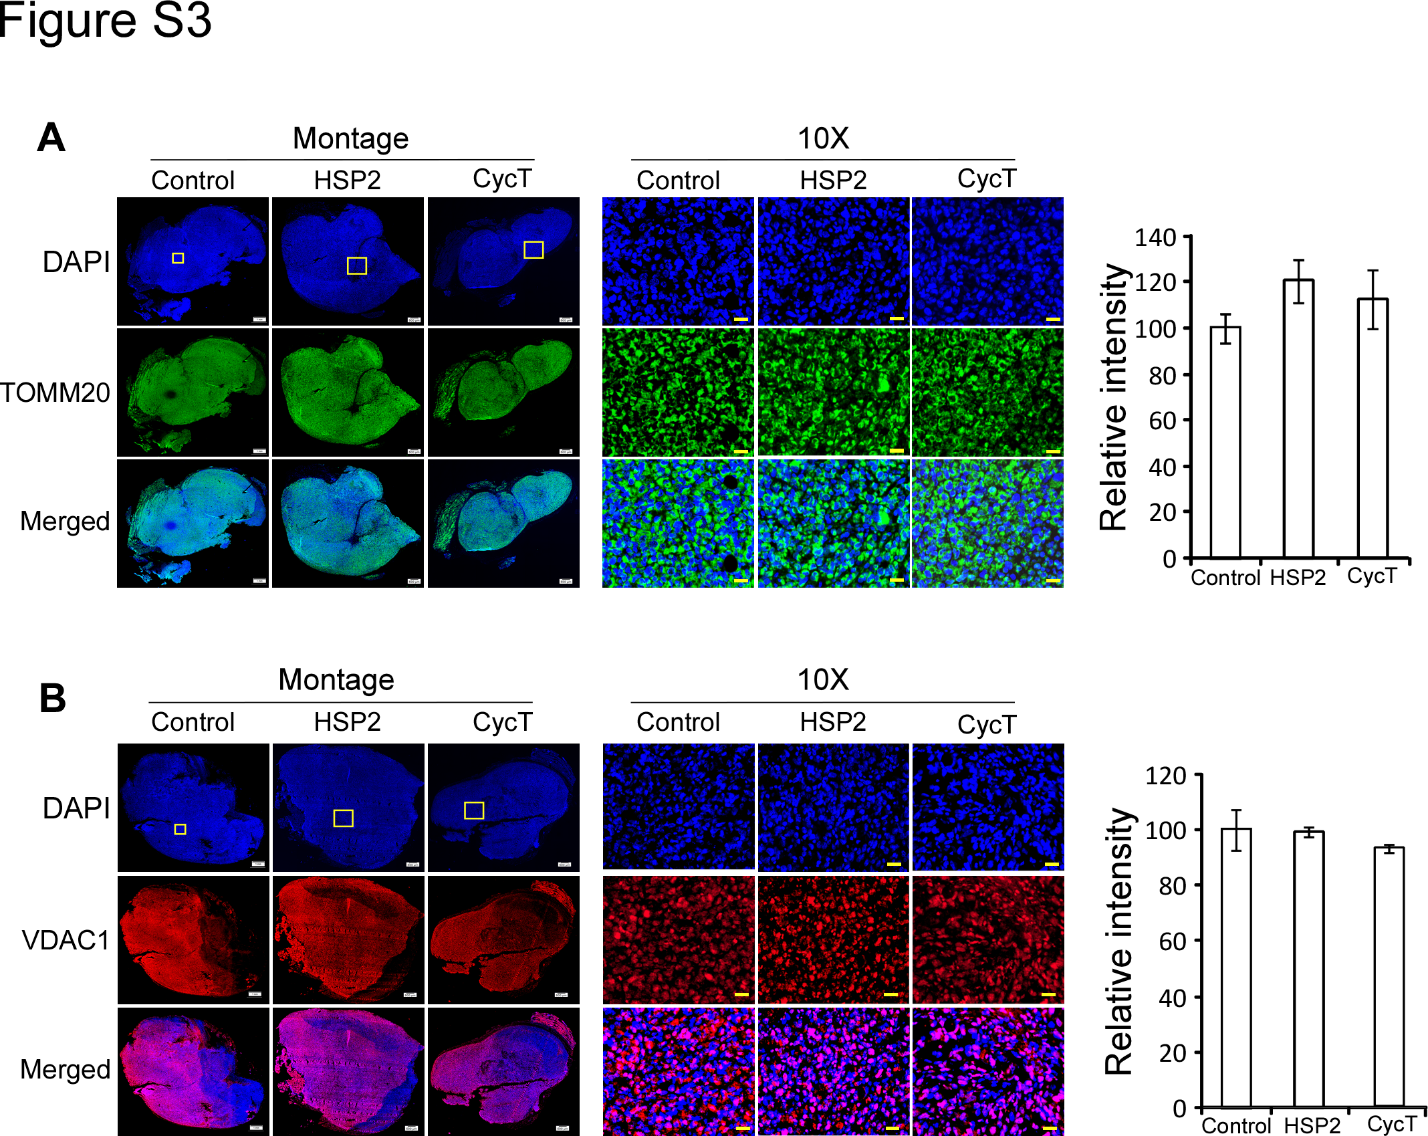


Fig. S3. Treatment with HSP2 or CycT does not affect mitochondrial structural proteins in tumor tissues. (A) Representative IHC images of H1299 NSCLC tumor tissue sections and graphs showing the levels of the mitochondria marker TOMM20 in control, HSP2, and CycT-treated tumors. (B) Representative IHC images of H1299 tumor tissue sections and graphs showing the levels of the mitochondria marker VDAC1 in control, HSP2, and CycT-treated tumors. Data are plotted as mean ± SD. For statistical analysis, the levels in treated mice were compared to the levels in untreated mice with a Welch 2-sample t-test. No statistical significance was detected in any group.
