# Supplementary material for: Oxygen-Enhanced Optoacoustic Tomography Reveals the Effectiveness of Targeting Heme and Oxidative Phosphorylation at Normalizing Tumor Vascular Oxygenation
Source: Oxford University Press journal article supplement (doi:10.1158/0008-5472.can-19-3247), 2020-06-16
Supplement: 00085472can193247-sup-230823_3_supp_6342555_qbkmbx.docx [file 00085472can193247-sup-230823_3_supp_6342555_qbkmbx.docx]

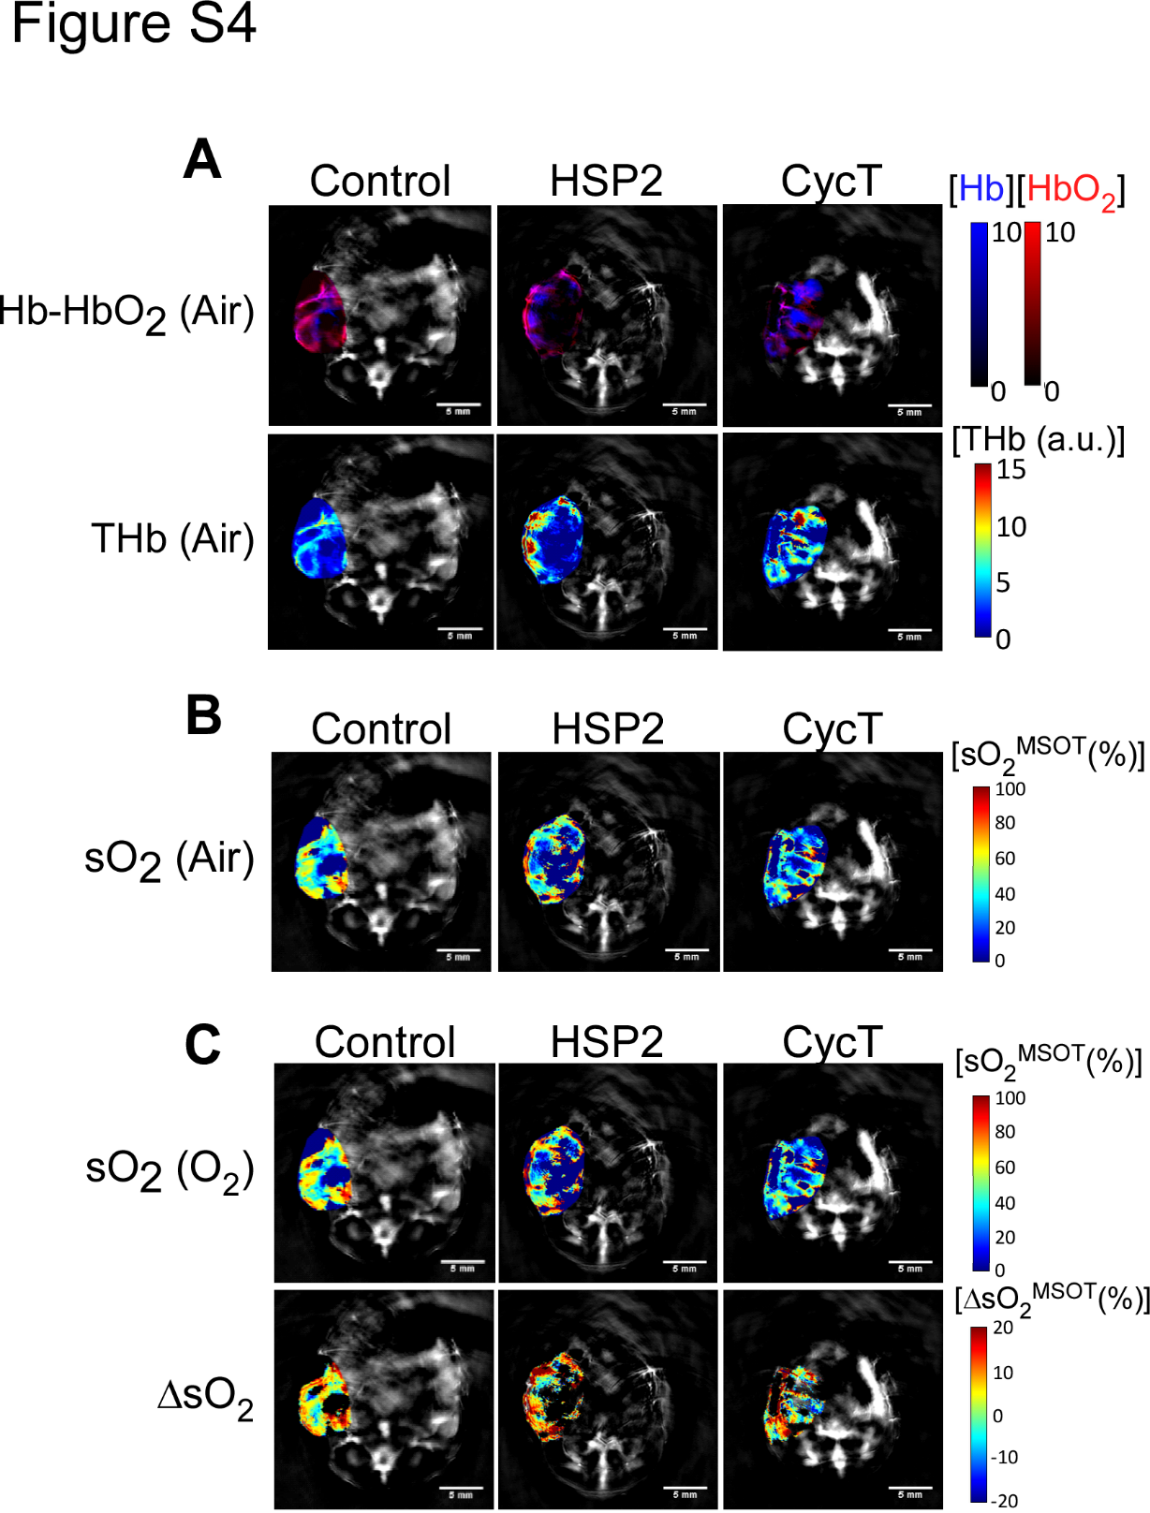


Fig. S4. MSOT images from control and HSP2- or CycT-treated tumors of similar size. The tumors were from the same experiment shown in Fig. 2. The quantified values for all parameters shown in Fig. 2 were not changed when tumor sizes were matched. (A) The spatial distribution of baseline deoxyhemoglobin (Hb; blue), oxyhemoglobin (HbO2; red), and total hemoglobin (THb). Maps were constructed using back-projection and spectral-unmixing overlaid on the grayscale image of the corresponding animals in each treatment group (control, HSP2 and CycT). (B) Representative tumor images of spatial distribution of baseline oxygen saturation in air. (C) Representative tumor images of spatial distribution of oxygen saturation [sO2 (O2)] after the oxygen challenge and the amplitude of signal change (ΔsO2) for each treatment group from breathing air to breathing 100% oxygen. Tumor sizes are listed in Materials and Methods. Specifically, the sizes of the three shown tumors were: Control: 176 mm3, HSP2: 158 mm3, CycT: 138 mm3.
